# Supplementary material for: Size-controllable palladium nanoparticles immobilized on carbon nanospheres for nitroaromatic hydrogenation
Source: Royal Society of Chemistry journal article supplement (doi:10.1039/c3ta00159h), 2013-01-01
Supplement: c3ta00159h.pdf [file c3ta00159h.pdf]

Electronic Supplementary Information

**Size-controllable palladium nanoparticles immobilized on  
carbon nanosphere for nitroaromatics hydrogenation**

Yong-Ming Lu<sup>a</sup>, Hai-Zhou Zhu<sup>a</sup>, Wei-Gu Li<sup>a</sup>, Bo Hu<sup>a</sup>, Shu-Hong Yu<sup>\*a</sup>

<sup>a</sup> Division of Nanomaterials & Chemistry, Hefei National Laboratory for Physical  
Sciences at Microscale, the School of Chemistry and Materials, University of Science  
and Technology of China, Hefei 230026, PR China.

E-mail: shyu@ustc.edu.cn

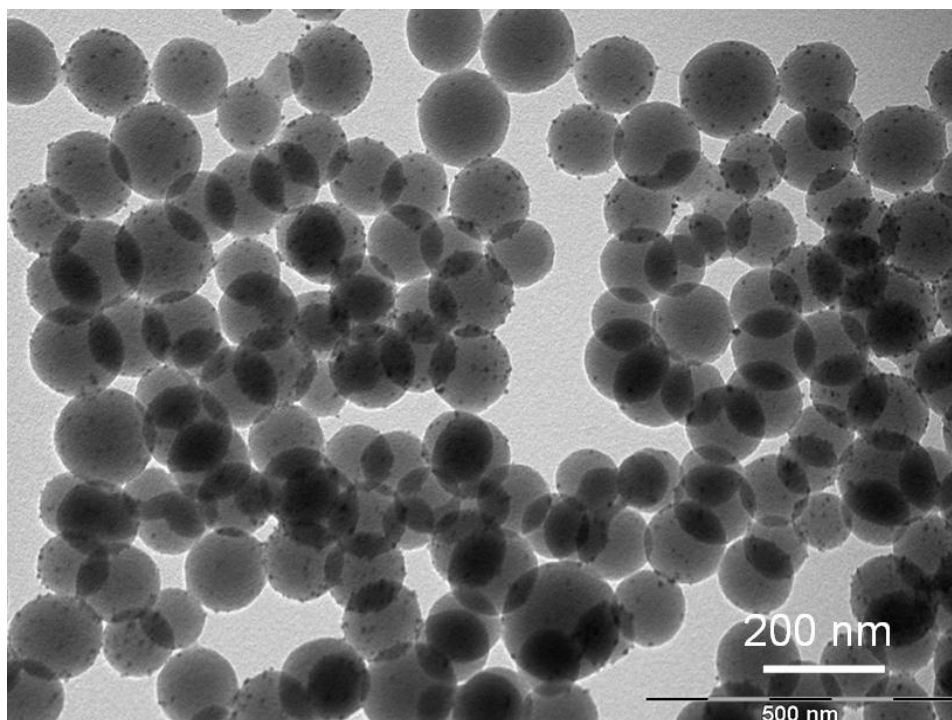

**Fig. S1** TEM image for 1.36 wt% Pd/CSs.

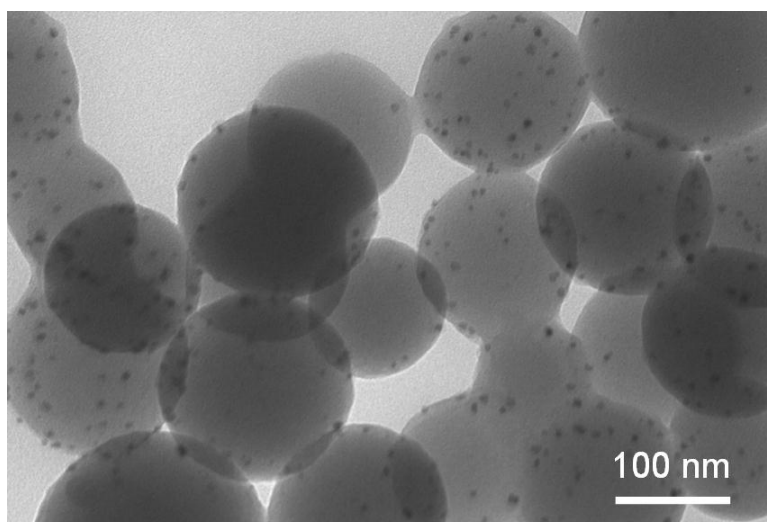

**Fig. S2** TEM image for 0.84 wt% Pd/CSs.

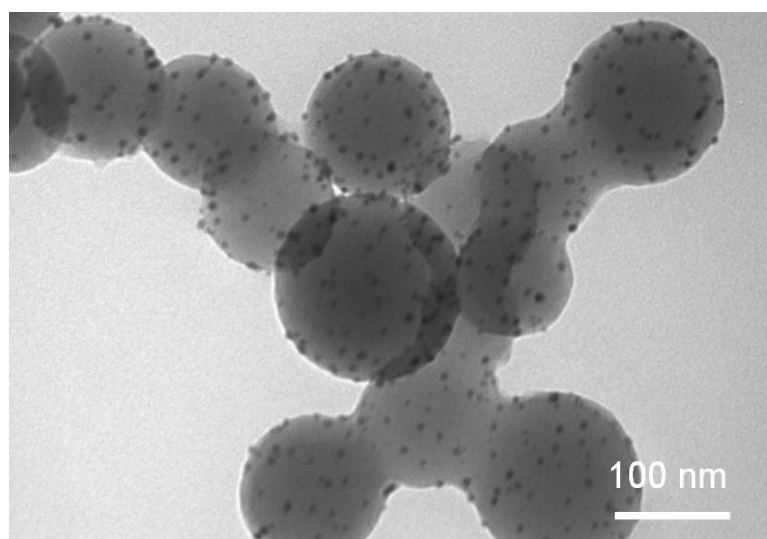

**Fig. S3** TEM image for 3.06 wt% Pd/CSs.

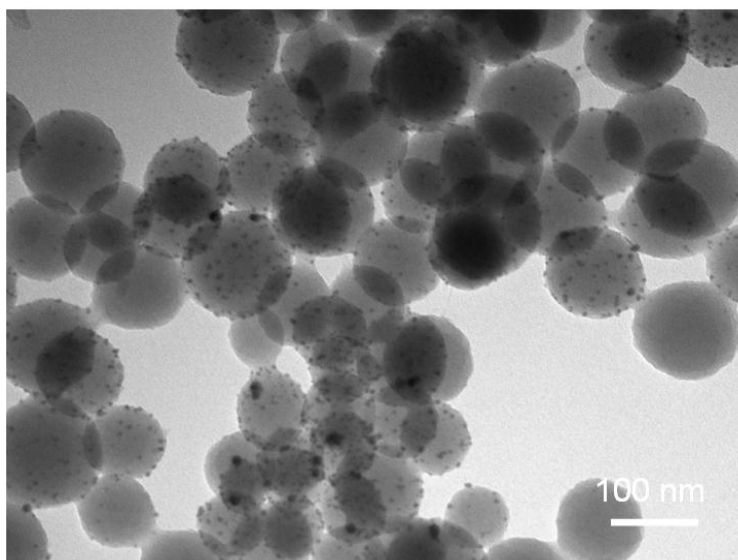

**Fig. S4** TEM image for recovered Pd/CSs.

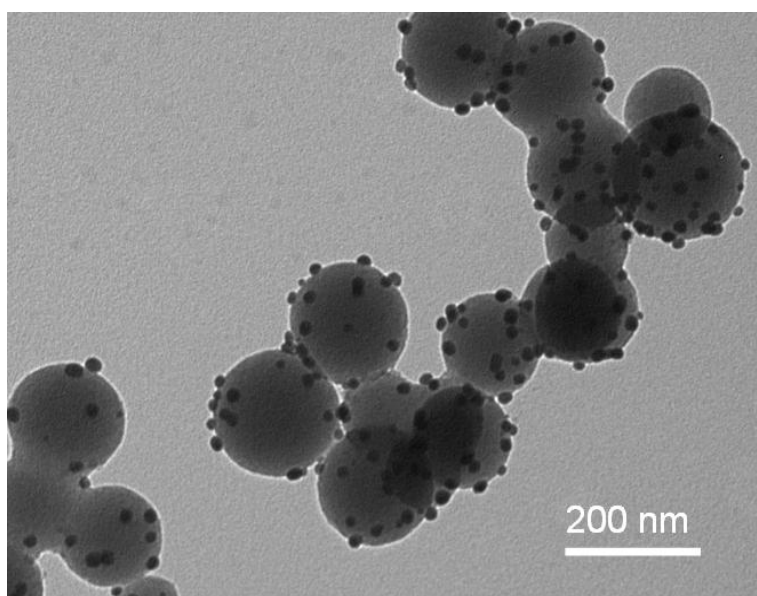

**Fig. S5** TEM image for Pd/CSs-PdCl<sub>2</sub>.

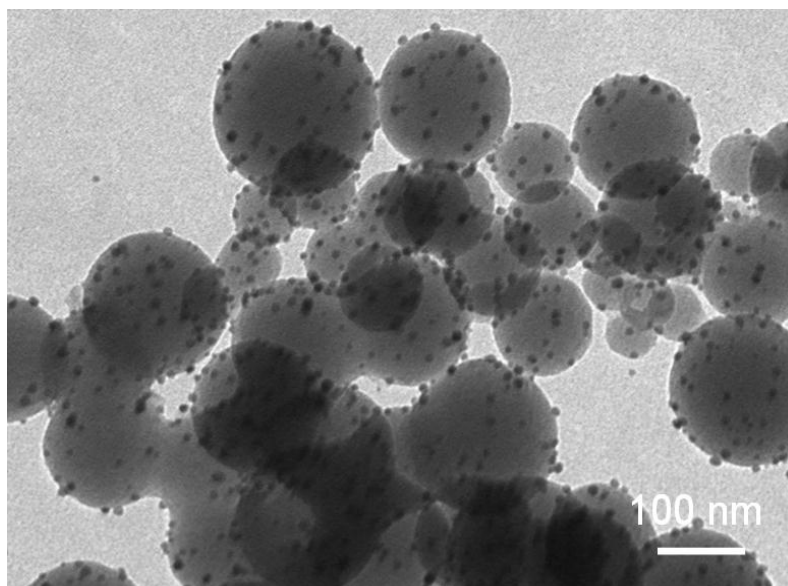

**Fig. S6** TEM image for Pd/CSs-PdCl<sub>2</sub>(NaCl).

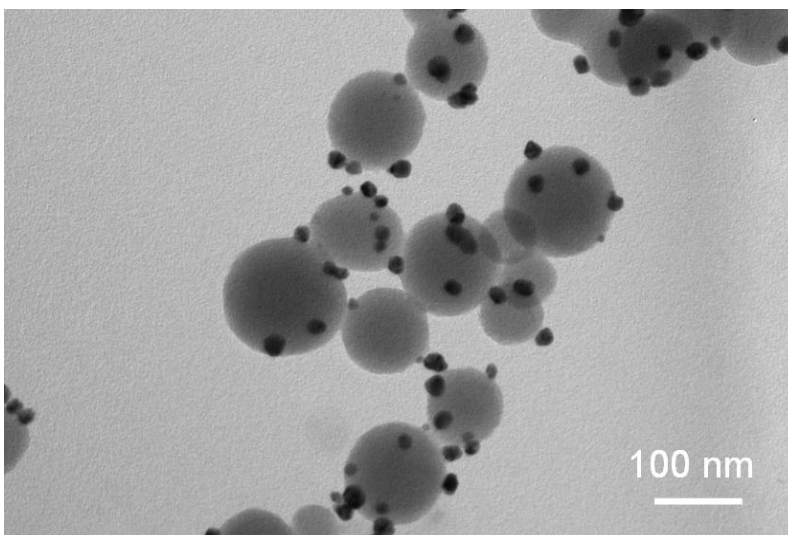

**Fig. S7** TEM image for Pd/CSs-PdCl<sub>2</sub>(HCl).

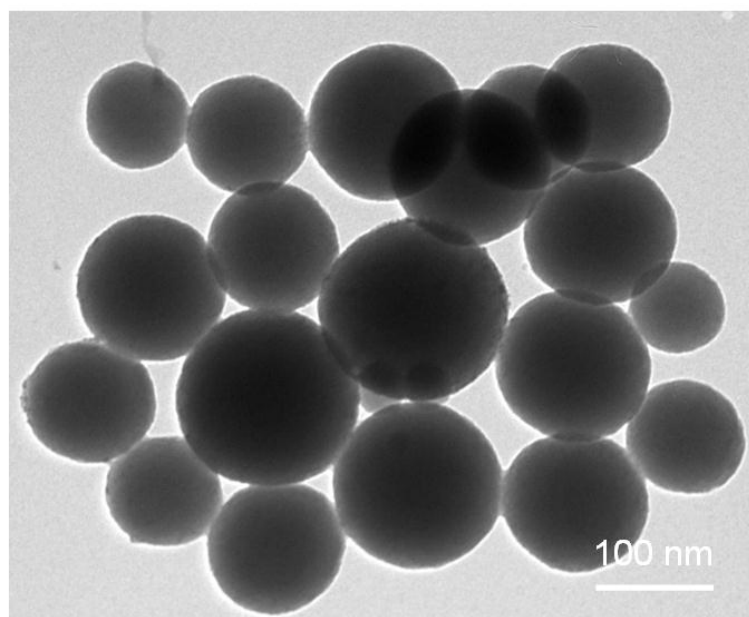

**Fig. S8** TEM image for Pd/CSs- $\text{Na}_2\text{PdCl}_4(\text{NaOH})$ .
